# Supplementary material
Source: Springer Nature journal article supplement (https://www.springermedizin.de/resource/supplementary/12936_2004_118_MOESM1_ESM.pdf/9546950)

# HIV Prevalence %

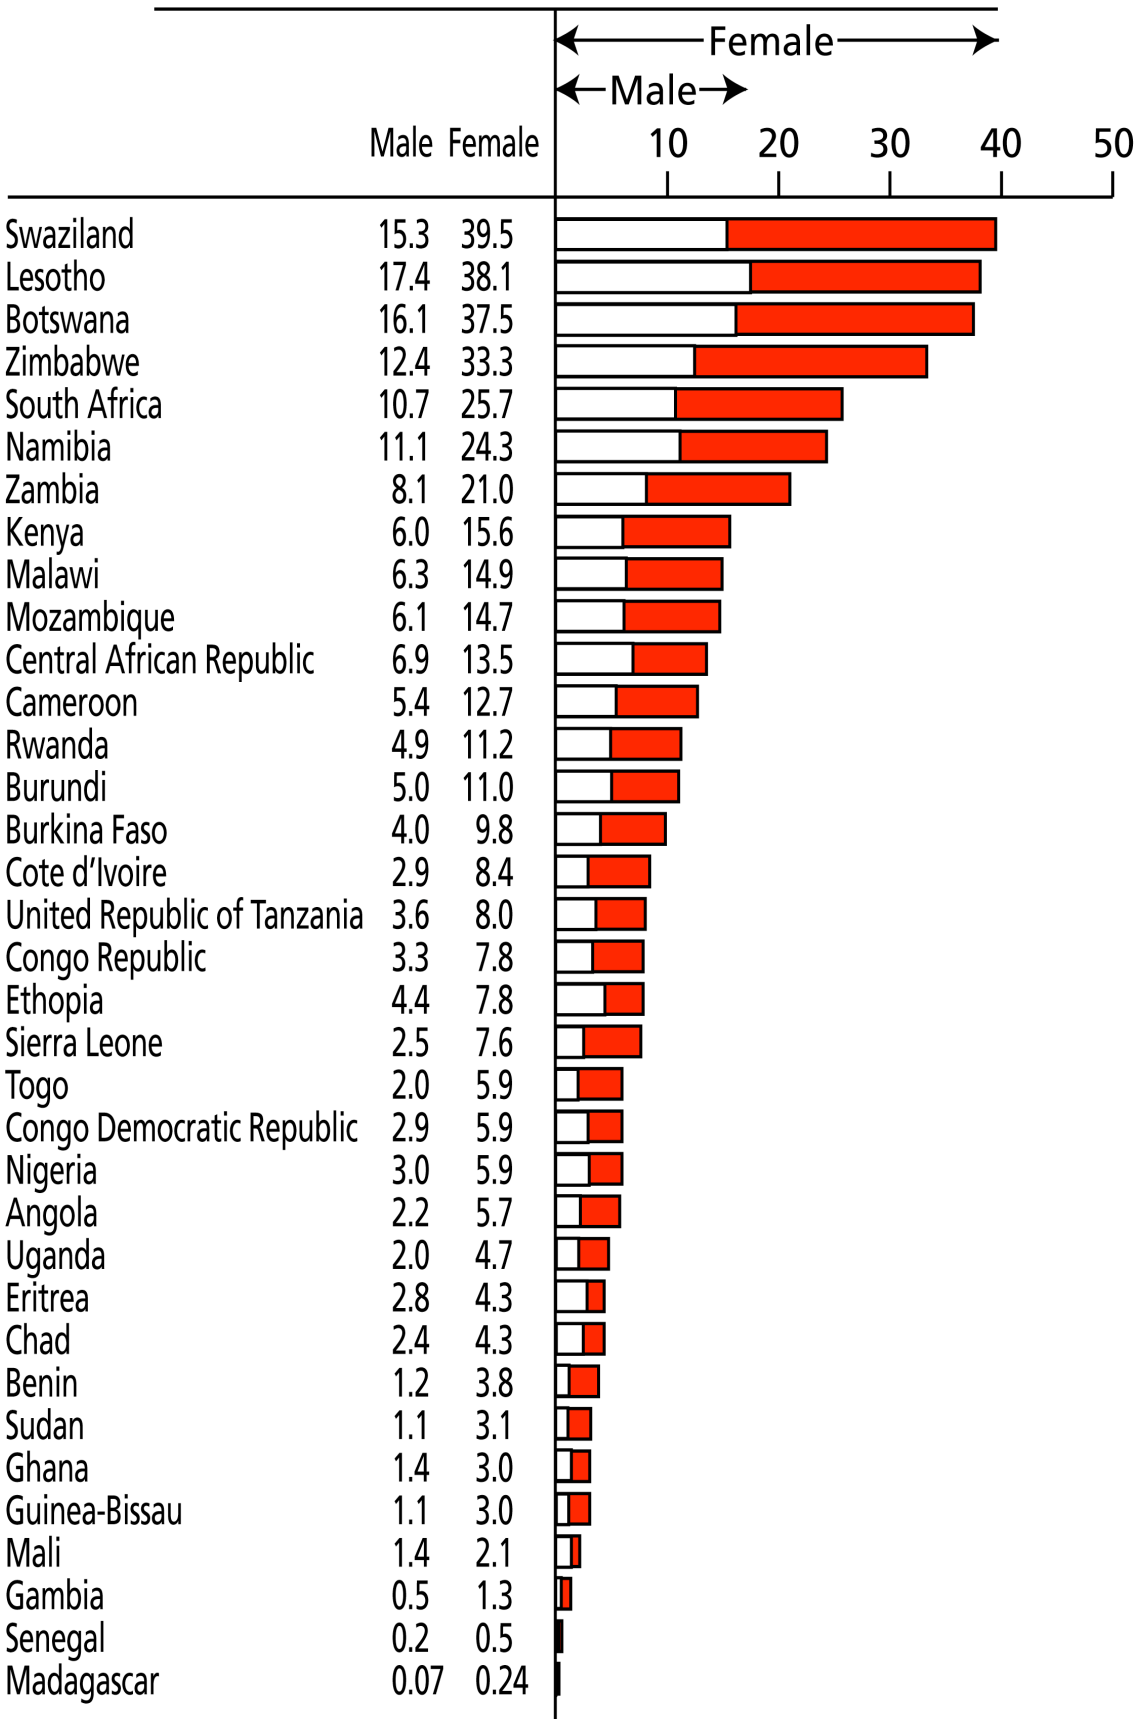

Supplement: MOESM1 [file 9546950]
